# Supplementary material
Source: ML conference proceedings conference paper supplement (https://proceedings.neurips.cc/paper_files/paper/2016/hash/0bf727e907c5fc9d5356f11e4c45d613-Abstract.html)
Supplement: Supplementary file [file 0bf727e907c5fc9d5356f11e4c45d613-Supplemental.zip]

## A Omitted Proofs

*Proof of Lemma 2.* To obtain the inequality of the lemma, define for every  $t = 1, \dots, T$  and  $i = 2, \dots, K$  the indicator variable  $\zeta_i^t$  which returns 1 when  $I^t = i$  and  $N_i^t \geq \sharp(\Delta_i, \delta)$ , and returns 0 otherwise. We can show that  $\zeta_i^t = 1$  with probability smaller than  $2\delta$ .

Note that if  $I^t = i$  then the upper confidence estimate for  $i$  was larger than that of action 1. More precisely, it must be that  $\hat{\mu}_i^t + \varsigma(N_i^t) \geq \hat{\mu}_1^t + \varsigma(N_1^t)$ . For this to occur, either we had (a) a large underestimate on  $\mu_1$ , that is  $\hat{\mu}_1^t + \varsigma(N_1^t) \leq \mu_1$ . Or, (b) we had a major overestimate on  $\mu_i$ , that is,  $\hat{\mu}_i^t + \varsigma(N_i^t) \geq \mu_1$ . It is clear that (a) occurs with probability less than  $\delta$  by construction of  $\varsigma$ .

To analyze (b), note that  $\mu_1 = \mu_i + \Delta_i$ , and we are also given that  $N_i^t \geq \sharp(\Delta_i, \delta)$  which implies that  $\varsigma(N_i^t) \leq \Delta_i/2$ .

$$\hat{\mu}_i^t + \varsigma(N_i^t) \geq \mu_1 \implies \hat{\mu}_i^t \geq \mu_i + \varsigma(N_i^t) \implies \hat{\mu}_i^t - \mu_i \geq \varsigma(N_i^t),$$

and of course the latter happens with probability no more than  $\delta$ .

Since

$$\Phi(N_2^{T+1}, \dots, N_K^{T+1}) = 2 \sum_{i=1}^K \sum_{N=0}^{N_i^{T+1}} \varsigma(N) \leq 2 \sum_{i=1}^K \left( \sum_{N=0}^{\sharp(\Delta_i, \delta)} \varsigma(N) + \sum_{t=1}^T \zeta_i^t \right)$$

We can conclude that

$$\mathbb{E}[\Phi(N_2^{T+1}, \dots, N_K^{T+1})] \leq \Phi(\sharp(\Delta_2, \delta), \dots, \sharp(\Delta_K, \delta)) + 2 \mathbb{E}[\sum_{i=2}^K \sum_{t=1}^T \zeta_i^t] \leq \Phi(\sharp(\Delta_2, \delta), \dots, \sharp(\Delta_K, \delta)) + 4T^2\delta.$$

□

*Proof Sketch of Theorem 2.* The proof follows much in the same way as that of Theorem 1. The regret suffered on round  $t$  of DKWUCB is exactly  $F_{i^*(c^t)}(c^t) - F_{I^t}(c^t)$ . Let  $\xi^t$  be the indicator equal to 0 on the event that both  $F_{i^*(c^t)}(c^t) \leq \hat{F}_{i^*(c^t)}(c^t) + \varsigma(N_{I^t}^t, \delta)$  and  $\hat{F}_{I^t}(c^t) \leq F_{I^t}(c^t) + \varsigma(N_{I^t}^t, \delta)$ , where  $\varsigma$  was chosen so that  $\mathbb{E}[\xi^t] \leq 2\delta$ . On  $\xi^t = 0$ , the KWUCB selection rule guarantees that  $F_{i^*(c^t)}(c^t) - F_{I^t}(c^t) \leq 2\varsigma(N_{I^t}^t, \delta) \leq 2\varsigma(\tilde{N}_{I^t}^t, \delta)$  (c.f. Lemma 1 for details). Thus, we can bound  $F_{i^*(c^t)}(c^t) - F_{I^t}(c^t) \leq 2\varsigma(\tilde{N}_{I^t}^t, \delta) + \xi^t$ .

Noting that  $\Phi(\tilde{N}_1^{t+1}, \dots, \tilde{N}_K^{t+1}) - \Phi(\tilde{N}_1^t, \dots, \tilde{N}_K^t) = 2\varsigma(\tilde{N}_{I^t}^t, \delta)$  when  $i^*(c^t) \neq I^t$  and 0 otherwise, we can bound cumulative regret by telescoping  $\Phi$ , giving us

$$\mathbb{E}[\text{Regret}_T(\text{DKWUCB})] \leq \mathbb{E}[\Phi(\tilde{N}_1^{T+1}, \dots, \tilde{N}_K^{T+1})] + \mathbb{E}[\sum_{t=1}^T \xi^t] \leq \mathbb{E}[\Phi(\tilde{N}_1^{T+1}, \dots, \tilde{N}_K^{T+1})] + 2T\delta$$

Now define  $\zeta_i^t$  as the indicator variable which returns one on the event that  $I^t = i$ ,  $i^*(c^t) \neq i$ , and  $\tilde{N}_i^t > \min_{j \in M} \Delta_i(j)$ . By similar arguments to Lemma 2, one can bound  $\mathbb{E}[\zeta_i^t] \leq 2\delta$ . Since with probability one  $\Phi(\tilde{N}_1^{T+1}, \dots, \tilde{N}_K^{T+1}) \leq 2 \sum_{i=1}^K \left( \sum_{N=0}^{\sharp(\min_j \Delta_i(j), \delta)} \varsigma(N) + \sum_{t=1}^T \zeta_i^t \right)$ , we have

$$\mathbb{E}[\text{Regret}_T(\text{DKWUCB})] \leq \Phi(\sharp(\min_j \Delta_1(j), \delta), \dots, \sharp(\min_j \Delta_K(j), \delta)) + O(T^2\delta)$$

The remainder of the proof follows identically to that of Theorem 1, by bounding the sum  $\Phi(\sharp(\min_j \Delta_1(j), \delta), \dots, \sharp(\min_j \Delta_K(j), \delta)) = \sum_{i=1}^K \sum_{N=0}^{\sharp(\min_j \Delta_i(j), \delta)} \varsigma(N, \delta)$ , and tuning  $\delta$ .

□

*Proof of Lemma 4.* At time  $t$ , let  $t_k$  be the index  $\tau$  of the  $k$ th time step at which  $I^\tau = i$  and  $c^\tau \geq j$ . By definition, we have that  $k \leq N_i^t(j)$ . We also define  $Y_0 = 0$  and  $Y_k = \sum_{l=1}^k (F_i(j) - \mathbb{I}[A^l \geq j])$  for each

$k \in \{0, 1, 2, \dots, N_i^t(j)\}$ . Note that

$$\begin{aligned}\mathbb{E}[Y_k | Y_{k-1}, \dots, Y_1] &= \mathbb{E}[Y_k | Y_{k-1}] = \mathbb{E}[Y_{k-1} + F_i(j) - \mathbb{I}[A^{t_k} \geq j] | Y_{k-1}] \\ &= \mathbb{E}[Y_{k-1} | Y_{k-1}] + \mathbb{E}[F_i(j) - \mathbb{I}[A^{t_k} \geq j] | Y_{k-1}] \\ &= Y_{k-1} + \mathbb{E}[F_i(j) - \Pr(X_i^{t_k} \geq j | c^{t_k} \geq j) | Y_{k-1}] \\ &= Y_{k-1} + \mathbb{E}[F_i(j) - F_i(j) | Y_{k-1}] = Y_{k-1}.\end{aligned}$$

Therefore, the sequence  $Y_1, Y_2, \dots, Y_{N_i^t(j)}$  forms a martingale, and  $|Y_k - Y_{k-1}| \leq 1$  for each  $k$ . By Azuma's inequality, for any  $\epsilon > 0$ ,

$$\Pr\left(|Y_{N_i^t(j)}| \geq \epsilon N_i^t(j)\right) \leq 2 \exp\left(-\frac{\epsilon^2 N_i^t(j)}{2}\right).$$

Note that  $Y_{N_i^t(j)} = N_i^t(j) (F_i(j) - \hat{F}_i^t(j))$ , we have

$$\Pr(|\hat{F}_i^t(j) - F_i(j)| \geq \epsilon) \leq 2 \exp\left(-\frac{\epsilon^2 N_i^t(j)}{2}\right),$$

which concludes the lemma.  $\square$

*Proof of Theorem 5.* At an epoch  $k$ , denote the set of arm indices at the beginning as  $L_j^k$  for a threshold value  $j \in M$ . By the property of uniform exploration, we have

$$N_i^{t_k}(j) \geq (m - j + 1)k \quad \forall i \in L_j^k. \quad (9)$$

By Lemma 4, we have that for any  $i \in L_j^k$ , the difference between  $F_i(j)$  and  $\hat{F}_i^{t_k}(j)$  is upper bounded by  $\sqrt{4 \log(Tk) / (m - j + 1)k}$  with probability at least  $1 - 1/T^2 k^2$ , i.e.,

$$\Pr\left(|\hat{F}_i^{t_k}(j) - F_i(j)| \geq \sqrt{\frac{4 \log(Tk)}{(m - j + 1)k}}\right) \leq \frac{1}{T^2 k^2}. \quad (10)$$

Note that  $\sum_{k=1}^{\infty} 1/k^2 = \pi^2/6 < 2$ , by applying union bound three times, we have

$$\Pr\left(|\hat{F}_i^{t_k}(j) - F_i(j)| \leq \sqrt{\frac{4 \log(Tk)}{(m - j + 1)k}}\right) \geq 1 - \frac{2}{T} \quad (11)$$

holds for all epoch index  $k$ , arm index  $i$ , and threshold value  $j$ . Therefore, with probability at least  $1 - 2/T$ ,  $i^*(j)$  is never eliminated from  $L_j$  for all  $j \in M$ . Therefore, the expected regret for missed elimination is  $O(T \cdot 2/T) = O(1)$ .

We then bound the number of times a sub-optimal arm is pulled for a level  $j$  conditioning on  $i^*(j)$  is not eliminated from  $L_j^k$  for  $k = 1, 2, \dots, T/Km$ . In the worst case, to eliminate all sub-optimal arms  $i$  from  $L_j^k$ , KMUCB needs to come to an epoch  $k$  such that

$$|L_{j'}| = 1 \quad \forall j' < j, \quad (12)$$

$$\hat{F}_{i^*(j)}^{t_k}(j) - \hat{F}_i^{t_k}(j) \geq \sqrt{\frac{16 \log(Tk)}{(m - j + 1)k}} \quad \forall i \in [K] \setminus \{i^*(j)\}. \quad (13)$$

By Equation 11, we have with probability at least  $1 - 4/T$ ,

$$\hat{F}_{i^*(j)}^{t_k}(j) \geq F_{i^*(j)}(j) - \sqrt{\frac{4 \log(Tk)}{(m - j + 1)k}} \quad (14)$$

and

$$\hat{F}_i^{t_k}(j) \leq F_i(j) + \sqrt{\frac{4 \log(Tk)}{(m - j + 1)k}} \quad \forall i \in [K] \quad (15)$$

hold. Therefore, if for all  $i \neq i^*(j)$ ,  $k$  satisfies that

$$F_{i^*(j)}(j) - \sqrt{\frac{4 \log(Tk)}{(m-j+1)k}} - \left( F_i(j) + \sqrt{\frac{4 \log(Tk)}{(m-j+1)k}} \right) \geq \sqrt{\frac{16 \log(Tk)}{(m-j+1)k}}, \quad (16)$$

which is equivalent to

$$k \geq \frac{128 \log T}{(m-j+1) \min_{i \in [K]} \Delta_i^2(j)}, \quad (17)$$

then with probability at least  $1 - 4/T$ ,  $k$  satisfies inequality 13.

But inequality (12) implies that  $k$  would also need to be greater than or equal to  $\max_{j' < j} \frac{128 \log T}{(m-j+1) \min_{i \in [K]} \Delta_i^2(j)}$  in order all for sub-optimal arms to be removed from  $L_j^k$ . Therefore, it would be sufficient to set

$$k = \frac{128 \log T}{(m-j+1) \min_{i \in [K], j \in M} \Delta_i^2(j)}. \quad (18)$$

Using the fact that  $\sum_{j=1}^m \frac{1}{j} = \log m$ , this contributes a total of  $\sum_{i=1}^K \log m \frac{128 \max_{j \in M} \Delta_i(j) \log T}{\min_{i \in [K], j \in M} \Delta_i^2(j)}$  to the regret. Also noting that the regret comes from failing to remove any sub-optimal index  $i$  from any  $L_j$  is  $O(T \cdot 4/T) = O(1)$ , the total regret is

$$\sum_{i=1}^K \log m \frac{128 \max_{j \in M} \Delta_i(j) \log T}{\min_{i \in [K], j \in M} \Delta_i^2(j)} + O(1). \quad (19)$$

□
